# Supplementary material for: Genotypic Interaction in a National Network of Common Bean Trials Across the Three Cropping Seasons in Brazil
Source: Research Square preprint supplement (doi:10.21203/rs.3.rs-8000143/v1), 2025-11-18
Supplement: Supplementary file 1 [file d2d502b5197719f429ca3a67.docx]

**Online Resources 1**. Structure of the fitted models (*mod0* to *mod5*) and the fixed and random sources of variation retained and/or removed in each version.

| Model | Model Structure |
| --- | --- |
| *mod0* |  |
| *mod1* |  |
| *mod2* |  |
| *mod3* |  |
| *mod4* |  |
| *mod5* |  |

**Online Resource 2**. Descriptive statistics of productivity (kg ha⁻¹) of common bean genotypes, considering the three annual growing seasons (Wet, Dry, and Winter), carried out individually or grouped according to the seasonal configuration at the experimental sites, based on data from multi-environment trials conducted between 2011 and 2018.

| **Seasons** | | **Number of Locations** |  | **Number of Experiments** | **Number of Genotypes** | **Years Evaluated** | **Predominant Regions** | **Mean Productivity (kg ha-1) ± SD** | **Minimum Productivity (kg ha-1)** | **Maximum Productivity (kg ha-1)** | |
| --- | --- | --- | --- | --- | --- | --- | --- | --- | --- | --- | --- |
| **By location (combinations of season rotations)** | Wet | 26 |  | 86 | 85 | 2011 - 2017 | Central-West, Northeast, Southeast, South | 2236 ± 952 | 500 | 5483 |
| Wet, Winter | 9 |  | 73 | 85 | 2011 - 2017 | Central-West, Northeast, Southeast | 2150 ± 1043 | 500 | 5462 |
| Wet, Winter, Dry | 3 |  | 78 | 87 | 2011 - 2017 | Central-West, Southeast | 2080 ± 944 | 501 | 5485 |
| Wet, Dry | 12 |  | 102 | 81 | 2011 - 2018 | Central-West, Northeast, South | 2450 ± 1122 | 501 | 5485 |
| Winter | 9 |  | 34 | 54 | 2013 - 2017 | Central-West, Southeast | 1759 ± 782 | 500 | 5085 |
| Winter, Dry | 5 |  | 32 | 61 | 2011 - 2017 | | Central-West | | --- |  |  | | --- | | 1807 ± 834 | 500 | 4480 |
| Dry | 7 |  | 18 | 71 | 2011 - 2018 | Central-West, Northeast, Southeast, South | 1375 ± 630 | 502 | 3974 |
| **By season type** | Wet | 50 |  | 226 | 85 | 2011 - 2018 | Central-West, Northeast, Southeast, South | 2325 ± 870 | 500 | 5485 |
| Winter | 25 |  | 127 | 87 | 2011 - 2017 | Central-West, Northeast, Southeast | 2138 ± 751 | 501 | 5484 |
| Dry | 27 |  | 70 | 85 | 2011 - 2018 | Central-West, Northeast, Southeast, South | 1521 ± 563 | 501 | 5405 |

**Online Resources 3**. Box plot of productivity (kg ha⁻¹) of common bean genotypes, considering the three annual growing seasons (Wet, Dry, and Winter) and the two commercial types (Carioca and Black), based on data from multi-environment trials conducted between 2011 and 2018.

**
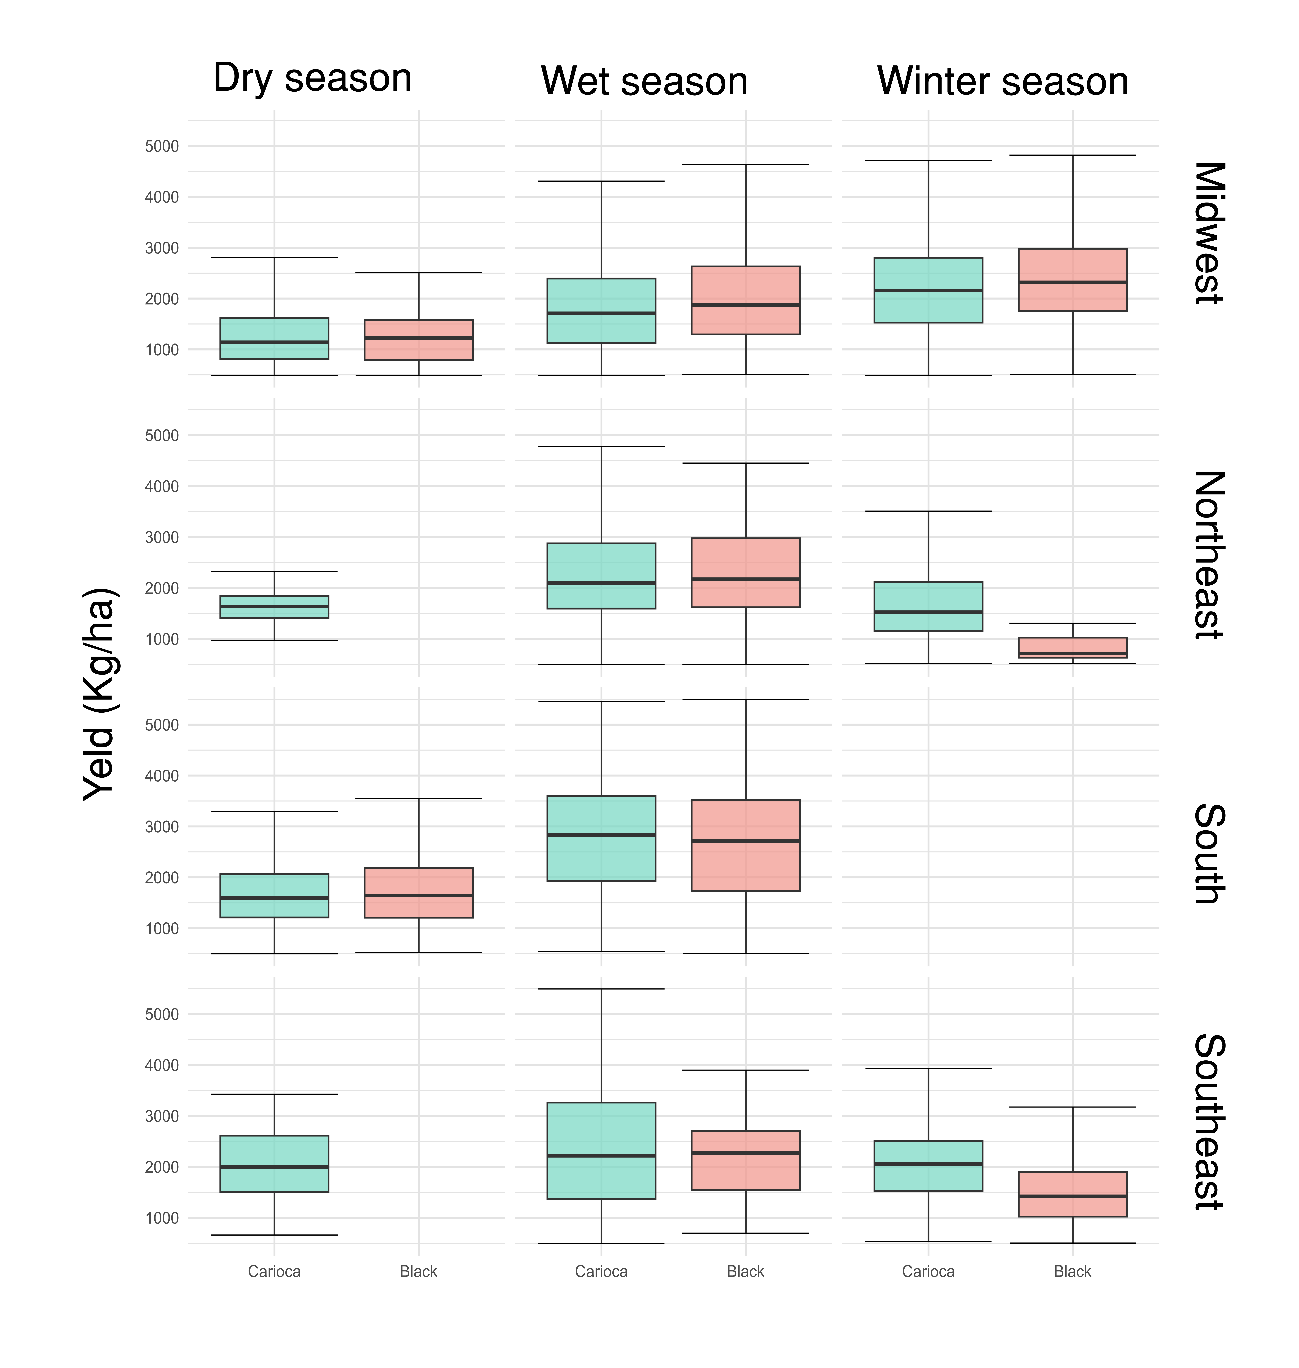
**

**Online Resources 4**. Results of the analysis of variance for the complete model (mod0), considering Season as a fixed effect, and variance decomposition of the random components associated with the productivity of common bean genotypes.

| **Fixed Effect** | **SumSQ** | **MeanSq** | | **DF** | | **DenDF** | **Fc** | | **p-valor** |
| --- | --- | --- | --- | --- | --- | --- | --- | --- | --- |
| Season | 1,21E+08 | 40358162 | | 3 | | 60,493 | 236,74 | | 0,00 *** |
| **Random Effects** | | | | **Variance** | | --- |  |  | | --- | | | **Standard Deviation** | | | **R2 (%)** | |
| GEN:LOC:YEAR:SEASON | | | 51140 | | 226,14 | | | 5,25% | |
| GEN:LOC:YEAR | | | 8544 | | 92,43 | | | 0,87% | |
| GEN:LOC: SEASON | | | 14603,1 | | 120,84 | | | 1,50% | |
| GEN:LOC | | | 3680,9 | | 60,67 | | | 0,37% | |
| GEN:YEAR: SEASON | | | 751,8 | | 27,42 | | | 0,07% | |
| BLC | | | 3907,3 | | 62,51 | | | 0,40% | |
| GEN:YEAR | | | 665,2 | | 25,79 | | | 0,06% | |
| GEN: SEASON | | | 4640,5 | | 68,12 | | | 0,47% | |
| EXP | | | 344417,7 | | 586,87 | | | 35,40% | |
| LOC:YEAR | | | 94066,7 | | 306,7 | | | 9,66% | |
| SEASON:LOC | | | 164622,6 | | 405,74 | | | 16,92% | |
| GEN | | | 8473,5 | | 92,05 | | | 0,87% | |
| LOC | | | 102325,9 | | 319,88 | | | 10,51% | |
| YEAR | | | 512,8 | | 22,65 | | | 0,05% | |
| Residual | | | 170477 | | 412,89 | | | 17,52% | |
| Total | | | 972829 | | - | | | 100,00% | |

**SumSQ**: sum of squares; **MeanSQ**: mean squares; **DF**: degrees of freedom; **DenDF**: denominator degrees of freedom; **Fc**: F value for the fixed effect test; **p-value**: probability associated with the F test; **GEN**: genotypes; **LOC**: locations; **EXP**: experiments; **BLC**: blocks.

**Online Resources 5**. Reaction norms for the Genotype × Year interaction, showing productivity over the years for each season based on the predicted productivity values of common bean genotypes, represented by BLUPs + Fixed effects.


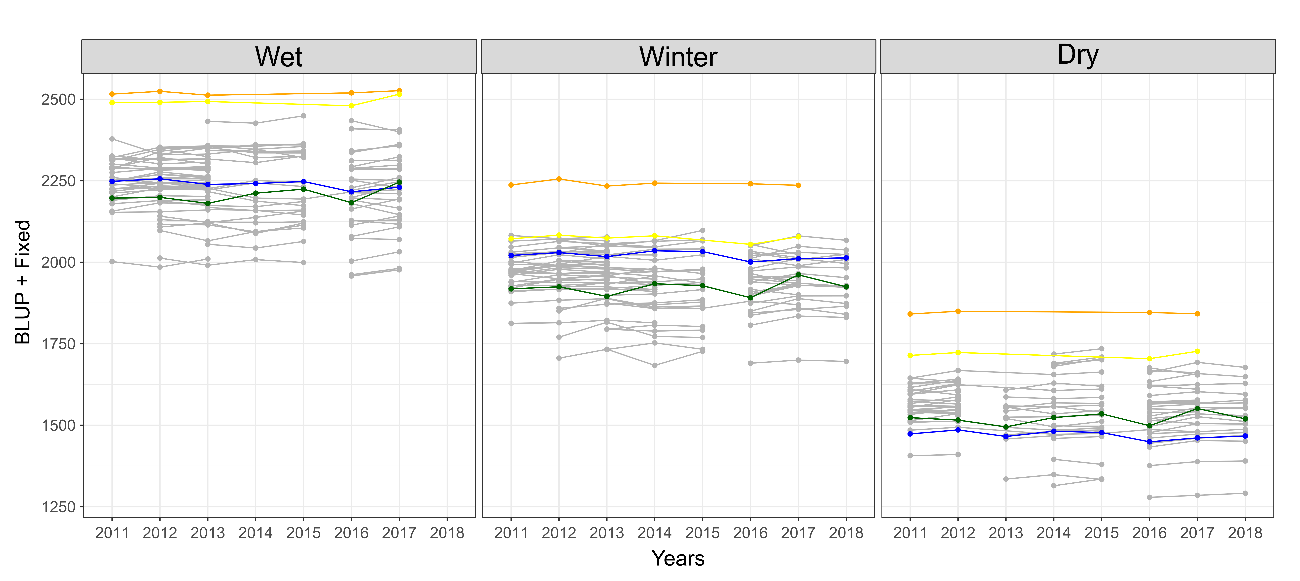


**Online Resources 6**. Coding and location (municipality, state, and region) of the 71 multi-environment trial sites of common bean (Phaseolus vulgaris L.), conducted by Embrapa between 2011 and 2018. The data cover 71 sites distributed across 4 of the 5 macro-regions of Brazil.

| Locations | City | State | Region |
| --- | --- | --- | --- |
| L01 | Caruaru | PE | Northeast |
| L02 | Sao Joao | PE | Northeast |
| L03 | Arapiraca | AL | Northeast |
| L04 | Craibas | AL | Northeast |
| L05 | Traipu | AL | Northeast |
| L06 | Arcoverde | PE | Northeast |
| L07 | Nossa Senhora das Dores | SE | Northeast |
| L08 | Santana do Ipanema | AL | Northeast |
| L09 | Poco Redondo | SE | Northeast |
| L10 | Frei Paulo | SE | Northeast |
| L11 | Lagarto | SE | Northeast |
| L12 | Ibimirim | PE | Northeast |
| L13 | Carira | SE | Northeast |
| L14 | Paripiranga | BA | Northeast |
| L15 | Adustina | BA | Northeast |
| L16 | Belem do Sao Francisco | PE | Northeast |
| L17 | Sooretama | ES | Southeast |
| L18 | Araripina | PE | Northeast |
| L19 | Petrolina | PE | Northeast |
| L20 | Campos dos Goytacazes | RJ | Southeast |
| L21 | Macae | RJ | Southeast |
| L22 | Rio Das Ostras | RJ | Southeast |
| L23 | Araruama | RJ | Southeast |
| L24 | Janauba | MG | Southeast |
| L25 | Sete Lagoas | MG | Southeast |
| L26 | Lavras | MG | Southeast |
| L27 | Sao Joao D Alianca | GO | Central-West |
| L28 | Cristalina | GO | Central-West |
| L29 | Brasilia | DF | Central-West |
| L30 | Brasilia | DF | Central-West |
| L31 | Capao Bonito | SP | Southeast |
| L32 | Paranapanema | SP | Southeast |
| L33 | Avare | SP | Southeast |
| L34 | Itabera | SP | Southeast |
| L35 | Itai | SP | Southeast |
| L36 | Porangatu | GO | Central-West |
| L37 | Anapolis | GO | Central-West |
| L38 | Morro da Fumaca | SC | South |
| L39 | Taquarituba | SP | Southeast |
| L40 | Goiania | GO | Central-West |
| L41 | Santo Antonio de Goias | GO | Central-West |
| L42 | Ponta Grossa | PR | South |
| L43 | Araucaria | PR | South |
| L44 | Inhumas | GO | Central-West |
| L45 | Wenceslau Braz | PR | South |
| L46 | Tres Barras | SC | South |
| L47 | Canoinhas | SC | South |
| L48 | Santa Helena | GO | Central-West |
| L49 | Prudentopolis | PR | South |
| L50 | Rio Verde | GO | Central-West |
| L51 | Guarapuava | PR | South |
| L52 | Londrina | PR | South |
| L53 | Campos Novos | SC | South |
| L54 | Veranopolis | RS | South |
| L55 | Bom Sucesso do Sul | PR | South |
| L56 | Mangueirinhas | PR | South |
| L57 | Chapadao do Sul | MS | Central-West |
| L58 | Catanduvas | PR | South |
| L59 | Palma Sola | SC | South |
| L60 | Cruz Alta | RS | South |
| L61 | Santo Antonio do Leverger | MT | Central-West |
| L62 | Itaquirai | MS | Central-West |
| L63 | Dourados | MS | Central-West |
| L64 | Campo Verde | MT | Central-West |
| L65 | Sinop | MT | Central-West |
| L66 | Ponta Pora | MS | Central-West |
| L67 | Sorriso | MT | Central-West |
| L68 | Aquidauana | MS | Central-West |
| L69 | Tangara da Serra | MT | Central-West |
| L70 | Caceres | MT | Central-West |
| L71 | Campo Novo dos Parecis | MT | Central-West |
